# Supplementary material for: Increased Pace of Aging in COVID-Related Mortality
Source: MDPI journal article supplement (doi:10.3390/life11080730), 2021-07-22
Supplement: s1 [file s1]

# Supplementary Materials

## Metrics used

Metrics used to estimate BloodAge accuracy are Mean Absolute Error (MAE) and coefficient of determination ( $R^2$ ), as defined in `sklearn.metrics`.

### MedAE

$$MedAE = Median(|Age_{true,i} - Age_{predicted,i}|),$$

*for all  $i \in (1, N)$ , where  $N$  is the total number of samples*

### MAE

$$MAE = \frac{1}{N} \sum_{i=1}^N |Age_{true,i} - Age_{predicted,i}|, \text{ where } N \text{ is the total number of samples}$$

## BloodAge prediction

BloodAge biological age measures can be obtained by uploading clinical blood tests to Aging.AI or Young.AI free of charge.

The models presented at these websites use adjustments not described in the original 2018 publication <sup>1</sup>:

$$BloodAge_{i,adj} = BloodAge_i - (BloodAge_{Mean}^{CA_i} - CA_i)$$

where:  $BloodAge_i$  is the predicted age for the  $i^{th}$  patient;  $CA_i$  is the chronological age of the  $i^{th}$  patient.

$BloodAge_{Mean}^{CA_i}$  is the mean BloodAge for all people in the predictor's training data, whose chronological age is equal to  $CA_i$ .

This adjustment was used in the survival models used in this project. The full list of variables that can serve as input for BloodAge is as follows (in the order of descending importance): sex, BUN, RDW, CREA, MCV, ALB, GLC, NA+, ALP, CL, RBC, FERR, ALT, PLT, NEUTR%, MONO%, CHOLT, LDH, MCHC, TRIG, BILIT, EOS%, AST, LDL, HCT, HGB, GGT, K+, HDL, HGBA1C, CA, ESR, MCH, LYMPH%, BASO%, IRON, WBC, PROT, BILID, GLOBT, AAMY, UA, MPV, P, PDW, AFP, ATLYMPH.

## Survival model data preprocessing

### Methods

Training and verification data contained only the people infected with COVID. Patients with blood test discrepancies (immune cell counts not converging to WBC total count) were removed, as well as people with <30 blood parameters measured to ensure accurate BloodAge performance.

All the available blood biomarkers were transformed into two binary values to identify whether a patient's value is below or is above the leftover sample median. In case a missing value was encountered for a blood parameter, the median columns were both assigned zeroes. The model presented in the main text were trained using only the column that identifies if the patient belonged to the bottom half of the blood parameter distribution.

Smoking status was encoded as several alternative binary columns: "never smoker", "ever smoker", "current smoker". Body composition was encoded as two alternative binary columns: "overweight" (BMI>25 kg/m<sup>2</sup>) and "obese" (BMI > 30 kg/m<sup>2</sup>). The circulatory system state was encoded as one value — "HBP" (high blood pressure), which was equal to one if at admission both systolic pressure is above 140 mmHg and diastolic is above 90 mmHg. Otherwise, it was equal to zero. Sex was encoded as a value, that was equal to one if the stated sex was male and zero if it was female. Ethnicity was encoded as a binary value, which was equal to one if the person stated to be of African origin and zero otherwise. Biological age data was encoded as several alternative columns: delta age (BloodAge – actual age), underager (delta age < -3 years), overager (delta age > +3 years), aging group (-1 if the patient is an underager, +1 — overager, 0 — normal ager).

The blood parameters considered for inclusion into models were: whole blood immune cell count (WBC), ferritin (FERR), total protein (PROT), high density lipoprotein (HDL), hemoglobin (HGB), mean corpuscular volume (MCV), alanine transferase (ALT), mean platelet volume (MPV), hematocrit (HCT), chloride (CL), serum albumin (ALB), total cholesterol (CHOLT), triglycerides (TRIG), direct bilirubin (BILID), total bilirubin (BILIT), sodium (NA+), red blood cell count (RBC), differential immune cells (BASO%, EOS%, LYMPH%, MONO%, NEUTR%), mean corpuscular hemoglobin concentration (MCHC), potassium (K+), aspartate transaminase (AST), fasting glucose (GLC), lactate dehydrogenase (LDH), total globulins (GLOBT), phosphorus (P), calcium (CA), low density lipoprotein (LDL), platelet count (PLT), glycated hemoglobin (HGBA1C), mean corpuscular hemoglobin (MCH), red blood cell distribution width (RDW), blood urea nitrogen (BUN), creatinine (CREA), alkaline phosphatase (ALP).

Medical history terms available for analysis were: asthma, chronic obstructive pulmonary disease (COPD), coronary artery disease (CAD), congestive heart failure (CHF), chronic kidney disease (CKD), diabetes mellitus (DM), hypertension (HTN), cancer, number of comorbidities (N\_history).

Admission symptoms available for analysis were: high blood pressure (HBP), fever chills, headache, dyspnea, gastro intestinal (GI), myalgia, cough, chest pain, altered mental state (AMS), number of symptoms (N\_symptoms).

## Final model feature selection

### Methods

All survival models presented in this work were built using Lifelines library v.0.23.9 for Python 3. To build Cox Proportional Hazards (CPH) CoxPHFitter method was used.

The optimal variables to be included in the final model were established via a grid search procedure. Alternative variables were defined; only one of them could be present in a single model.

CPH models were initialized with default settings. All models were trained with 5-fold cross-validation (CV) on a set comprising 75% of all the available settings. All models were verified on a set comprising 25% of all the available samples. The folds and the verification set remained the same across all models.

First, 17970 models were trained to select the 50 most predictive variables. In this stage the models contained no more than one blood parameter, as well as the alternative ways to define chronological age (continuous, binary with a threshold at 65 years, binary plus number of years over 65), biological age (delta age, aging group, under-/over-/normal age columns, smoking (never smoker, ever smoker, current smoker), body composition (overweight, obese). Some models also included either the number of symptoms or comorbidities.

Each variable was rated according to the average c-index rank of the models it was a part of, 50 highest ranking variables were added into the second iteration. At this stage “never smoker” remained as the only smoking-related term in the top-50 list. A number of blood markers was removed at this stage.

During the second stage, 26100 models were trained using the 50 available variables. All the variables were scored in a similar fashion and 12 top-ranking variables were chosen for the final model, alongside “is male”, “is black” and “never smoker” for a total of 15 variables in the final model.

C-index, or concordance index, is a metric of survival model performance. It was calculated using `concordance_index` from `lifelines.utils`. C-index is the proportion of sample pairs where the model guessed the last survivor right. Being a proportion, c-index fits within the unit radius. Random models produce c-index equal to 50%, perfectly accurate survival models have 100% c-index (or 0%, if all its predictions are reversed). All the models presented in this article used individual survival function expected value to guess the last survivor for the purpose of c-index calculation.

### Results

A total of 26100 survival models were built for a CV subsample with 3987 patients, among which 1268 were confirmed dead at the end of observation (**Figure S1**).

The most descriptive features were selected as the 15 highest ranking variables (**Table S1**). Among them are five blood parameters: immune cell percentages (eosinophils, lymphocytes, monocytes, neutrophils), AMS, Dyspnea, DM, chronological age, delta age, BUN, LDH, creatinine, sex, race. All these variables, except age and delta age, are binary with cutoff values displayed in **Table S2**.

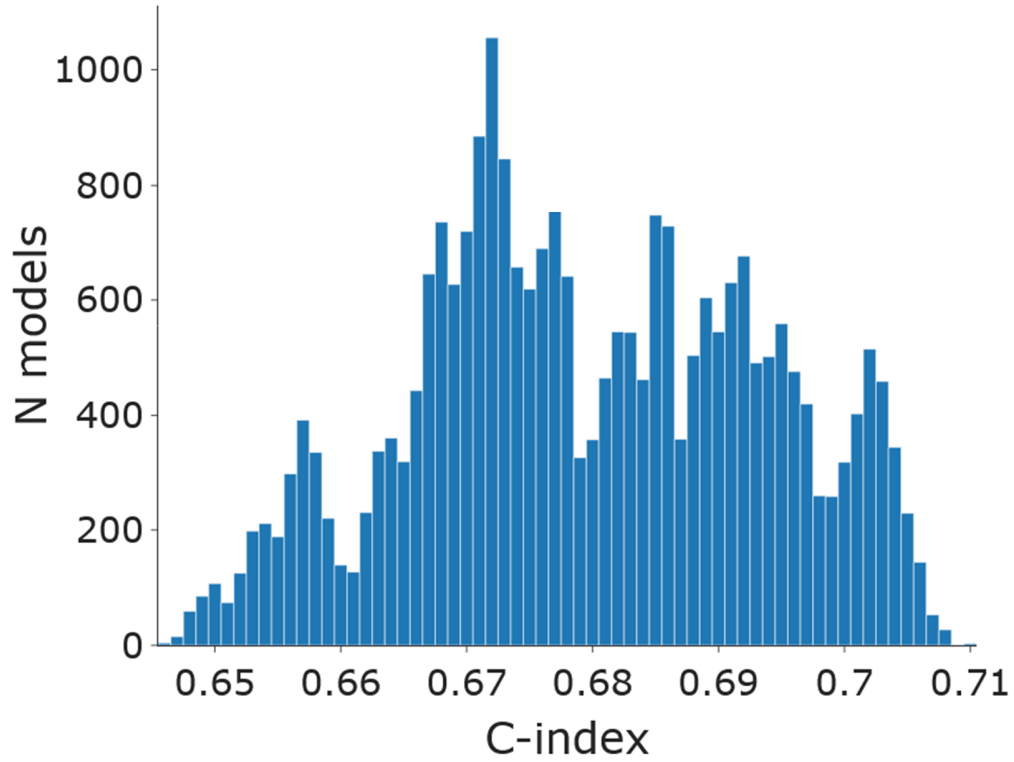

**Figure S1** — Among the 26100 tested survival models, only 2498 show c-index of  $\geq 0.70$ . C-index is the concordance index; c-index was calculated as the mean across five CV.

## Survival classifier

### Methods

Sensitivity and specificity in the survival status classifier are defined as:

$$Sensitivity = \frac{TP}{P} = \frac{TP}{TP + FN}$$

$$Specificity = \frac{TN}{N} = \frac{TN}{TN + FP}$$

where P is the total number of positive (dead at K days) patients; N is the total number of negative (alive after K days) patients; TP is the number of true positive predictions (predicted to die and is truly dead); TN is the number of true negative predictions (predicted to stay alive and is alive); FP is the number of false-positive predictions (predicted to die but was observed for longer); FN is the number of false-negative predictions (predicted to stay alive but was dead by the K<sup>th</sup> day).

The best timeframe was established in terms of the least distance between sensitivity and specificity (the most “balanced” frame).

## **Results**

The CPH classifier based on median time-to-death was used to calculate the sensitivity and the specificity in the verification set. The classifier shows its best performance when it is tasked with outcome prediction in 18 days — 62% specificity, 61% sensitivity.

While the verification set contains patients with extra long observation times, 90% of patients were observed for 24 days or less. In higher timeframes the sensitivity-specificity dependency is no longer monotonic, i.e. specificity may fluctuate at a constant sensitivity. This behavior is caused by the specifics of the metric calculation. People who were observed for T days and did not die would be eliminated from the metrics calculation in timeframes of >T days. If that person was predicted to survive for more than T days, this practically removes one true positive result which causes specificity (but not sensitivity) to noticeably decrease. The effects this shrinkage has on metrics are more noticeable in smaller samples — during longer timeframes when most patients are either no longer observed or dead.

## **Visualization**

Data visualization is achieved with Plotly (v.4.5.0) for Python and Seaborn (v.0.10.0).

**Table S1** — All the variables tested for inclusion into the final model (column “Included”) sorted by the normalized average rank of the models they were a part of (column “Score”). Top-12 variables were added along with “Is male”, “Is black”, and “Never smoker”, which were fixed at the previous stage of feature selection. “YrsOver65” was not included in the model, since it was ranked below “Age”, which describes the same patient data dimension. “Is male”, “Is black”, and “Never smoker” were present in every model tested and thus had 0-50 score. The rows with “None” mark the models that used no information of the specified kind. Green marks the variables included in the final model

| Variable            | Score | Data type    |
|---------------------|-------|--------------|
| Slice_bottom_MONO%  | 0.91  | Blood_Marker |
| Slice_bottom_NEUTR% | 0.90  | Blood_Marker |
| Slice_bottom_LDH    | 0.86  | Blood_Marker |
| Slice_bottom_CREA   | 0.81  | Blood_Marker |
| Slice_bottom_LYMPH% | 0.81  | Blood_Marker |
| Slice_bottom_BUN    | 0.74  | Blood_Marker |
| Slice_bottom_EOS%   | 0.64  | Blood_Marker |
| Age                 | 0.62  | Age          |
| Dyspnea             | 0.60  | Symptoms     |
| AMS                 | 0.57  | Symptoms     |
| YrsOver65           | 0.54  | Age          |
| DM                  | 0.53  | History      |
| Delta_age           | 0.52  | BloodAge     |
| Slice_bottom_GLC    | 0.52  | Blood_Marker |
| Slice_bottom_K+     | 0.52  | Blood_Marker |
| Slice_bottom_AST    | 0.52  | Blood_Marker |
| COPD                | 0.51  | History      |
| CAD                 | 0.50  | History      |
| GI                  | 0.50  | Symptoms     |
| Is_overweight       | 0.50  | Obesity      |
| ASTHMA              | 0.50  | History      |

|                   |      |              |
|-------------------|------|--------------|
| HTN               | 0.50 | History      |
| Never_smoker      | 0.50 | Smoking      |
| Is_male           | 0.50 | Sex          |
| Is_black          | 0.50 | Race         |
| Is_obese          | 0.50 | Weight       |
| CKD               | 0.49 | History      |
| Aging_group       | 0.49 | BloodAge     |
| CANCER            | 0.49 | Obesity      |
| CHF               | 0.49 | History      |
| Underager         | 0.49 | BloodAge     |
| Overager          | 0.49 | History      |
| ChestPain         | 0.49 | History      |
| Headache          | 0.48 | BloodAge     |
| Cough             | 0.47 | BloodAge     |
| HBP               | 0.47 | Symptoms     |
| Myalgia           | 0.47 | Symptoms     |
| Slice_bottom_FERR | 0.47 | Symptoms     |
| FeverChills       | 0.46 | Symptoms     |
| Over65            | 0.44 | Symptoms     |
| Slice_bottom_MPV  | 0.37 | Blood_Marker |
| Slice_bottom_RDW  | 0.36 | Symptoms     |
| Slice_bottom_ALB  | 0.27 | Blood_Marker |

|                   |      |              |
|-------------------|------|--------------|
| Slice_bottom_PLT  | 0.26 | Blood_Marker |
| Slice_bottom_P    | 0.25 | Blood_Marker |
| Slice_bottom_MCHC | 0.23 | Blood_Marker |
| Slice_bottom_CA   | 0.23 | Blood_Marker |
| Slice_bottom_TRIG | 0.22 | Blood_Marker |
| history:None      | 0.16 | Blood_Marker |
| blood_marker:None | 0.15 | Blood_Marker |
| symptoms:None     | 0.13 | Blood_Marker |

## COVID-related mortality odds ratios

### Methods

Odds ratio (OR) for binary variable  $i$  was defined as:

$$OR_i = \frac{a \div b}{c \div d} = \frac{N(\text{dead}|\text{exposed to } i) \div N(\text{dead}|\text{unexposed to } i)}{N(\text{not dead}|\text{exposed to } i) \div N(\text{not dead}|\text{unexposed to } i)}$$

where

$a$  is the number of lethal cases in which  $i = 1$ ,

$b$  is the number of lethal cases in which  $i = 0$ ,

$c$  is the number of non – lethal cases in which  $i = 1$ ,

$d$  is the number of non – lethal cases in which  $i = 0$

Confidence intervals (CI) for OR were calculated using the formula from <sup>2</sup>. Point estimate significance was estimated with `chi2_contingency` function from `scipy.stats` (v 1.4.1) for Python.

### Results

See Table S2.

**Table S2** — Odds ratios for all the binary present in the data.

|             | OR   | 2·5%<br>CI OR | 97·5% CI<br>OR | Pval(Fisher) | Pval(Chi2) | Support in<br>lethal cases<br>(positive<br>samples / non-<br>event<br>samples) | Support in<br>non-lethal<br>cases<br>(positive<br>samples /<br>non-event<br>samples) | Median cutoff<br>(blood<br>parameters<br>only) |
|-------------|------|---------------|----------------|--------------|------------|--------------------------------------------------------------------------------|--------------------------------------------------------------------------------------|------------------------------------------------|
| Normal_ager | 1·03 | 1·17          | 0·91           | 6·57E-01     | 6·67E-01   | 1164/525                                                                       | 2476/1150                                                                            |                                                |
| Over65      | 3·12 | 3·51          | 2·77           | 8·15E-80     | 6·80E-80   | 1039/650                                                                       | 1229/2397                                                                            |                                                |
| Overager    | 0·92 | 1·07          | 0·79           | 2·66E-01     | 2·73E-01   | 289/1400                                                                       | 667/2959                                                                             |                                                |
| Underager   | 1·06 | 1·25          | 0·89           | 5·18E-01     | 5·46E-01   | 236/1453                                                                       | 483/3143                                                                             |                                                |
| High ALB    | 0·33 | 0·37          | 0·29           | 2·37E-76     | 6·62E-76   | 618/1071                                                                       | 2308/1318                                                                            | 35 g/L                                         |
| Low ALB     | 3·16 | 3·57          | 2·81           | 9·65E-82     | 1·13E-81   | 1056/633                                                                       | 1252/2374                                                                            |                                                |
| High ALP    | 1·48 | 1·66          | 1·32           | 3·26E-11     | 3·89E-11   | 957/732                                                                        | 1700/1926                                                                            | 80 U/L                                         |
| Low ALP     | 0·70 | 0·79          | 0·62           | 2·12E-09     | 2·26E-09   | 717/972                                                                        | 1860/1766                                                                            |                                                |
| High ALT    | 1·11 | 1·25          | 0·99           | 7·24E-02     | 7·58E-02   | 888/801                                                                        | 1810/1816                                                                            | 33 U/L                                         |
| Low ALT     | 0·93 | 1·05          | 0·83           | 2·50E-01     | 2·53E-01   | 786/903                                                                        | 1750/1876                                                                            |                                                |
| High AST    | 2·22 | 2·50          | 1·97           | 1·26E-40     | 3·38E-40   | 1072/617                                                                       | 1591/2035                                                                            | 46 U/L                                         |
| Low AST     | 0·47 | 0·52          | 0·41           | 4·19E-37     | 1·14E-36   | 601/1088                                                                       | 1967/1659                                                                            |                                                |
| High BASO%  | 0·55 | 0·62          | 0·49           | 3·32E-23     | 4·65E-23   | 676/1013                                                                       | 1981/1645                                                                            | 0·21 %                                         |
| Low BASO%   | 1·81 | 2·03          | 1·61           | 2·51E-23     | 3·85E-23   | 1013/676                                                                       | 1644/1982                                                                            |                                                |
| High BILID  | 2·39 | 3·02          | 1·88           | 9·68E-15     | 1·84E-13   | 1600/89                                                                        | 3201/425                                                                             | 3·42 uM                                        |
| Low BILID   | 0·42 | 0·54          | 0·32           | 1·42E-12     | 1·57E-11   | 74/1615                                                                        | 357/3269                                                                             |                                                |
| High BILIT  | 1·29 | 1·45          | 1·15           | 2·10E-05     | 2·34E-05   | 1031/658                                                                       | 1988/1638                                                                            | 8·55 uM                                        |
| Low BILIT   | 0·81 | 0·91          | 0·72           | 3·35E-04     | 3·56E-04   | 643/1046                                                                       | 1570/2056                                                                            |                                                |
| High BUN    | 5·19 | 5·93          | 4·55           | 3·69E-149    | 2·45E-142  | 1318/371                                                                       | 1473/2153                                                                            | 6·43 mM                                        |



|             |      |      |      |           |           |          |           |         |
|-------------|------|------|------|-----------|-----------|----------|-----------|---------|
| Low BUN     | 0.19 | 0.22 | 0.17 | 3.86E-147 | 4.05E-140 | 367/1322 | 2133/1493 | 2.21 mM |
| High CA     | 0.89 | 0.99 | 0.79 | 4.21E-02  | 4.34E-02  | 821/868  | 1872/1754 |         |
| Low CA      | 1.15 | 1.29 | 1.02 | 2.16E-02  | 2.31E-02  | 864/825  | 1732/1894 |         |
| High CHOLT  | 0.73 | 0.88 | 0.60 | 8.90E-04  | 1.13E-03  | 159/1530 | 454/3172  | 3.44 mM |
| Low CHOLT   | 1.25 | 1.49 | 1.05 | 1.42E-02  | 1.50E-02  | 220/1469 | 388/3238  |         |
| High CL     | 1.20 | 1.35 | 1.07 | 2.31E-03  | 2.53E-03  | 975/714  | 1931/1695 | 100 mM  |
| Low CL      | 0.83 | 0.93 | 0.74 | 1.70E-03  | 1.79E-03  | 711/978  | 1694/1932 |         |
| High CREA   | 3.66 | 4.15 | 3.23 | 6.25E-100 | 1.78E-97  | 1203/486 | 1462/2164 | 84.9 uM |
| Low CREA    | 0.28 | 0.31 | 0.24 | 5.31E-98  | 1.50E-95  | 482/1207 | 2144/1482 |         |
| High EOS%   | 0.36 | 0.41 | 0.32 | 4.64E-63  | 4.64E-62  | 562/1127 | 2096/1530 | 0.19 %  |
| Low EOS%    | 2.75 | 3.10 | 2.43 | 4.64E-63  | 4.64E-62  | 1127/562 | 1530/2096 |         |
| High FERR   | 1.93 | 2.17 | 1.71 | 7.32E-28  | 4.93E-28  | 839/850  | 1228/2398 | 1816 pM |
| Low FERR    | 0.49 | 0.56 | 0.44 | 2.24E-29  | 1.20E-28  | 472/1217 | 1593/2033 |         |
| High GLC    | 2.80 | 3.16 | 2.48 | 2.79E-65  | 3.26E-64  | 1132/557 | 1525/2101 | 7.05 mM |
| Low GLC     | 0.36 | 0.40 | 0.31 | 9.55E-66  | 1.09E-64  | 554/1135 | 2098/1528 |         |
| High GLOBT  | 1.36 | 1.55 | 1.20 | 3.69E-06  | 3.20E-06  | 502/1187 | 859/2767  | 32 g/L  |
| Low GLOBT   | 1.03 | 1.18 | 0.89 | 7.42E-01  | 7.55E-01  | 347/1342 | 730/2896  |         |
| High HCT    | 0.79 | 0.89 | 0.70 | 6.94E-05  | 7.36E-05  | 788/901  | 1905/1721 | 38.3 %  |
| Low HCT     | 1.27 | 1.42 | 1.13 | 6.94E-05  | 7.36E-05  | 901/788  | 1721/1905 |         |
| High HDL    | 0.78 | 0.94 | 0.65 | 9.89E-03  | 1.08E-02  | 175/1514 | 466/3160  | 0.83 mM |
| Low HDL     | 1.19 | 1.42 | 0.99 | 6.54E-02  | 6.98E-02  | 204/1485 | 376/3250  |         |
| High HGB    | 0.66 | 0.74 | 0.58 | 1.18E-12  | 1.42E-12  | 737/952  | 1962/1664 | 124 g/L |
| Low HGB     | 1.52 | 1.71 | 1.36 | 1.18E-12  | 1.42E-12  | 952/737  | 1664/1962 |         |
| High HGBA1C | 1.09 | 1.27 | 0.93 | 3.01E-01  | 3.12E-01  | 290/1399 | 581/3045  | 6.6 %   |
| Low HGBA1C  | 0.89 | 1.05 | 0.76 | 1.83E-01  | 1.92E-01  | 232/1457 | 549/3077  |         |
| High K+     | 1.67 | 1.88 | 1.49 | 5.33E-18  | 7.21E-18  | 991/698  | 1666/1960 | 4.3 mM  |

|             |      |      |      |           |           |          |           |            |
|-------------|------|------|------|-----------|-----------|----------|-----------|------------|
| Low K+      | 0.57 | 0.64 | 0.51 | 4.29E-21  | 7.08E-21  | 649/1040 | 1895/1731 |            |
| High LDH    | 3.86 | 4.36 | 3.42 | 2.13E-110 | 1.78E-110 | 1073/616 | 1127/2499 | 441 U/L    |
| Low LDH     | 0.25 | 0.28 | 0.22 | 5.81E-103 | 2.52E-97  | 343/1346 | 1838/1788 |            |
| High LDL    | 0.59 | 0.72 | 0.48 | 1.34E-07  | 3.31E-07  | 132/1557 | 456/3170  | 1.76 mM    |
| Low LDL     | 1.34 | 1.60 | 1.12 | 1.84E-03  | 1.73E-03  | 219/1470 | 364/3262  |            |
| High LYMPH% | 0.17 | 0.20 | 0.15 | 9.89E-171 | 9.63E-164 | 381/1308 | 2276/1350 | 13.26 %    |
| Low LYMPH%  | 5.79 | 6.62 | 5.08 | 4.75E-171 | 5.78E-164 | 1308/381 | 1349/2277 |            |
| High MCH    | 1.06 | 1.19 | 0.94 | 3.31E-01  | 3.35E-01  | 872/817  | 1819/1807 | 28.9 pg    |
| Low MCH     | 0.94 | 1.06 | 0.84 | 3.31E-01  | 3.35E-01  | 817/872  | 1807/1819 |            |
| High MCHC   | 0.49 | 0.56 | 0.44 | 2.86E-32  | 5.17E-32  | 665/1024 | 2058/1568 | 323 g/L    |
| Low MCHC    | 2.02 | 2.27 | 1.80 | 2.86E-32  | 5.17E-32  | 1024/665 | 1568/2058 |            |
| High MCV    | 1.57 | 1.76 | 1.39 | 3.44E-14  | 4.39E-14  | 979/710  | 1697/1929 | 89 fL      |
| Low MCV     | 0.64 | 0.72 | 0.57 | 3.44E-14  | 4.39E-14  | 710/979  | 1929/1697 |            |
| High MONO%  | 0.22 | 0.25 | 0.19 | 5.02E-133 | 7.97E-129 | 434/1255 | 2223/1403 | 6.27 %     |
| Low MONO%   | 4.59 | 5.21 | 4.04 | 2.61E-133 | 5.07E-129 | 1255/434 | 1402/2224 |            |
| High MPV    | 1.71 | 1.92 | 1.52 | 2.08E-19  | 2.75E-19  | 1027/662 | 1724/1902 | 10.6 fL    |
| Low MPV     | 0.51 | 0.58 | 0.45 | 1.16E-28  | 2.90E-28  | 575/1114 | 1822/1804 |            |
| High NA+    | 1.91 | 2.15 | 1.70 | 1.56E-27  | 3.12E-27  | 1047/642 | 1669/1957 | 139 mM     |
| Low NA+     | 0.52 | 0.58 | 0.46 | 4.01E-28  | 6.54E-28  | 638/1051 | 1956/1670 |            |
| High NEUTR% | 5.95 | 6.80 | 5.21 | 2.77E-175 | 9.03E-168 | 1315/374 | 1347/2279 | 77.75%     |
| Low NEUTR%  | 0.17 | 0.19 | 0.15 | 5.85E-175 | 1.51E-167 | 374/1315 | 2278/1348 |            |
| High P      | 2.11 | 2.38 | 1.86 | 4.27E-32  | 8.61E-33  | 682/1007 | 882/2744  | 1.10 mM    |
| Low P       | 0.96 | 1.09 | 0.84 | 5.16E-01  | 5.23E-01  | 480/1209 | 1063/2563 |            |
| High PLT    | 0.58 | 0.66 | 0.52 | 1.28E-19  | 1.65E-19  | 694/995  | 1974/1652 | 231x10E9/L |
| Low PLT     | 1.70 | 1.92 | 1.52 | 2.86E-19  | 3.43E-19  | 993/696  | 1652/1974 |            |
| High PROT   | 0.57 | 0.64 | 0.51 | 1.18E-21  | 1.37E-21  | 742/947  | 2103/1523 | 67 g/L     |

|                |      |      |      |          |          |          |           |              |
|----------------|------|------|------|----------|----------|----------|-----------|--------------|
| Low PROT       | 1.83 | 2.06 | 1.63 | 1.75E-24 | 1.88E-24 | 932/757  | 1457/2169 |              |
| High RBC       | 0.65 | 0.73 | 0.58 | 2.58E-13 | 3.14E-13 | 723/966  | 1943/1683 | 4.34x10E12/L |
| Low RBC        | 1.54 | 1.73 | 1.37 | 2.58E-13 | 3.14E-13 | 966/723  | 1683/1943 |              |
| High RDW       | 2.63 | 2.97 | 2.33 | 3.97E-58 | 2.52E-57 | 1116/573 | 1542/2084 | 13.8%        |
| Low RDW        | 0.38 | 0.43 | 0.34 | 1.60E-58 | 1.27E-57 | 571/1118 | 2082/1544 |              |
| High TRIG      | 1.27 | 1.51 | 1.06 | 8.46E-03 | 8.87E-03 | 223/1466 | 388/3238  | 1.56 mM      |
| Low TRIG       | 0.71 | 0.86 | 0.59 | 4.37E-04 | 5.57E-04 | 156/1533 | 454/3172  |              |
| High WBC       | 3.47 | 3.93 | 3.07 | 1.77E-92 | 2.44E-90 | 1192/497 | 1481/2145 | 63x10E9/L    |
| Low WBC        | 0.29 | 0.33 | 0.25 | 1.77E-92 | 2.44E-90 | 497/1192 | 2145/1481 |              |
| AMS            | 2.66 | 3.06 | 2.31 | 3.17E-41 | 2.96E-43 | 495/1194 | 489/3137  |              |
| CAD            | 1.70 | 2.01 | 1.45 | 3.73E-10 | 1.88E-10 | 291/1398 | 395/3231  |              |
| HTN            | 1.67 | 1.89 | 1.48 | 1.55E-16 | 3.21E-16 | 1187/502 | 2124/1502 |              |
| CKD            | 1.63 | 2.00 | 1.33 | 3.70E-06 | 2.87E-06 | 175/1514 | 240/3386  |              |
| COPD           | 1.61 | 1.98 | 1.30 | 1.39E-05 | 9.93E-06 | 165/1524 | 229/3397  |              |
| CHF            | 1.48 | 1.79 | 1.23 | 4.88E-05 | 4.51E-05 | 203/1486 | 306/3320  |              |
| DM             | 1.44 | 1.62 | 1.28 | 6.24E-10 | 7.13E-10 | 875/814  | 1549/2077 |              |
| CANCER         | 1.08 | 1.30 | 0.90 | 4.42E-01 | 4.50E-01 | 186/1503 | 373/3253  |              |
| ASTHMA         | 0.88 | 1.05 | 0.75 | 1.60E-01 | 1.64E-01 | 218/1471 | 521/3105  |              |
| Ever_smoker    | 0.81 | 0.94 | 0.70 | 5.25E-03 | 5.59E-03 | 314/1375 | 796/2830  |              |
| Current_smoker | 0.53 | 0.70 | 0.40 | 3.56E-06 | 7.65E-06 | 64/1625  | 252/3374  |              |
| Is_male        | 1.08 | 1.21 | 0.95 | 2.46E-01 | 2.50E-01 | 1088/601 | 2275/1351 |              |
| Is_obese       | 0.92 | 1.04 | 0.82 | 1.95E-01 | 2.03E-01 | 569/1120 | 1288/2338 |              |
| Is_overweight  | 0.90 | 1.01 | 0.79 | 8.08E-02 | 8.55E-02 | 1132/557 | 2517/1109 |              |
| Is_black       | 0.84 | 0.97 | 0.74 | 1.51E-02 | 1.60E-02 | 379/1310 | 926/2700  |              |
| Never_smoker   | 0.56 | 0.64 | 0.50 | 1.36E-21 | 9.89E-22 | 849/840  | 2326/1300 |              |
| Dyspnea        | 1.85 | 2.12 | 1.62 | 2.90E-20 | 1.32E-19 | 1318/371 | 2383/1243 |              |

|                    |      |      |      |          |          |          |           |  |
|--------------------|------|------|------|----------|----------|----------|-----------|--|
| <b>HBP</b>         | 1.05 | 1.28 | 0.85 | 6.75E-01 | 7.03E-01 | 150/1539 | 309/3317  |  |
| <b>FeverChills</b> | 0.81 | 0.91 | 0.72 | 5.18E-04 | 5.23E-04 | 933/756  | 2187/1439 |  |
| <b>Cough</b>       | 0.74 | 0.83 | 0.65 | 2.24E-07 | 2.46E-07 | 875/814  | 2153/1473 |  |
| <b>Myalgia</b>     | 0.65 | 0.77 | 0.55 | 7.16E-07 | 1.15E-06 | 199/1490 | 616/3010  |  |
| <b>ChestPain</b>   | 0.57 | 0.67 | 0.48 | 1.46E-11 | 4.79E-11 | 197/1492 | 686/2940  |  |
| <b>GI</b>          | 0.56 | 0.65 | 0.49 | 9.68E-17 | 3.22E-16 | 345/1344 | 1133/2493 |  |
| <b>Headache</b>    | 0.45 | 0.61 | 0.34 | 1.46E-08 | 6.24E-08 | 58/1631  | 264/3362  |  |

## Blood parameters in the COVID infected

### Methods

All blood biomarkers had their distributions in lethal and non-lethal COVID cases approximated using Kernel Density Estimation (KDE). KDE was implemented using the `KernelDensity` method from `scikit-learn` v0.22.1. Kernel type was set to Gaussian, in all cases the bandwidth parameter was equal to 0.5 standard deviation of the feature within the total sample.

### Results

We identified seven blood parameters as the most descriptive ones in terms of survival modeling. The cutoff values we used for some of them are outside the commonly used clinical reference ranges (**Table S3**). However, these reference ranges were derived for the healthy population and may be inappropriate while assessing the risks in the COVID-infected cohorts. Here we present the blood biomarker distributions in the COVID infected to illustrate that conventional definitions for “high” or “low” blood parameters are poor predictors of COVID-related mortality. Choosing the cutoffs that are within the normal range would result in an uneven proportion of the patients below and above the threshold (**Figure S2**).

Among the best blood predictors of COVID survival, all biomarkers show clear distinction between the distributions for lethal and non-lethal cases. In the cases of LDH, LYMPH%, MONO%, and NEUTR% the median cutoffs are located near the intersection of the lethal and non-lethal density functions, which is probably the reason for their superior discriminating properties.

For comparison, the non-predictive blood features, such as TRIG, have similar distributions within the lethal and non-lethal subsamples (**Figure S2**).

**Table S3** — very few COVID patients have their blood parameters within the normal range, thus the cutoff values for binary variables were chose based on COVID sample medians. Green marks the blood parameters used in the final model.

| Biomarker | Normal range <sup>3</sup>                      | N within,<br>patients | N above,<br>patients | N below,<br>patients | N missing,<br>patients |
|-----------|------------------------------------------------|-----------------------|----------------------|----------------------|------------------------|
| ALT       | F:7-35; M:10-40 U/L                            | 2919                  | 2210                 | 105                  | 81                     |
| ALB       | 34-48 g/L                                      | 3212                  | 34                   | 1988                 | 81                     |
| ALP       | 25-100 U/L                                     | 3701                  | 1521                 | 12                   | 81                     |
| AST       | 10-30 U/L                                      | 1265                  | 3955                 | 11                   | 84                     |
| BILIT     | 5-21 uM                                        | 4362                  | 436                  | 434                  | 83                     |
| BILID     | 0-3.4 uM                                       | 431                   | 4801                 | 0                    | 83                     |
| CA        | 2.15-2.5 mM                                    | 3230                  | 199                  | 1860                 | 26                     |
| CL        | 98-106 mM                                      | 2774                  | 890                  | 1647                 | 4                      |
| CHOLT     | 0-5.18 mM                                      | 1148                  | 73                   | 0                    | 4094                   |
| CREA      | F:53-97; M:62-115uM                            | 2641                  | 1757                 | 893                  | 24                     |
| FERR      | F:22.5-270; M:45-562 pM                        | 413                   | 3709                 | 10                   | 1183                   |
| GLC       | >60 years: 4.4-6.4 mM<br>≤60 years: 4.1-5.9 mM | 1696                  | 3454                 | 159                  | 6                      |
| GLOBT     | 22-40 g/L                                      | 2137                  | 243                  | 58                   | 2877                   |
| HDL       | F: >0.91; M: >0.75 mM                          | 672                   | 0                    | 549                  | 4094                   |
| LDH       | 208-378 U/L                                    | 1424                  | 2751                 | 206                  | 934                    |
| LDL       | <3.37 mM                                       | 1119                  | 52                   | 0                    | 4144                   |
| P         | 0.87-1.45 mM                                   | 1841                  | 639                  | 627                  | 2208                   |
| PROT      | 64-84 g/L                                      | 3467                  | 106                  | 1661                 | 81                     |
| TRIG      | <2.83 mM                                       | 1081                  | 140                  | 0                    | 4094                   |
| BUN       | 2.1-7.1 mM                                     | 2712                  | 2484                 | 95                   | 24                     |
| HCT       | F:35-45; M:39-49%                              | 2756                  | 227                  | 2332                 | 0                      |
| HGB       | F:120-160; M:135-175 g/L                       | 2097                  | 33                   | 3185                 | 0                      |
| WBC       | 4.5-11 x10E9/L                                 | 0                     | 5315                 | 0                    | 0                      |
| MCH       | 26-34 pg                                       | 4573                  | 66                   | 676                  | 0                      |
| MCHC      | 310-370 g/L                                    | 4249                  | 10                   | 1056                 | 0                      |
| MCV       | 80-100 fL                                      | 4615                  | 240                  | 460                  | 0                      |
| PLT       | 150-450 x10E9/L                                | 4051                  | 332                  | 930                  | 2                      |
| RBC       | F: 3.8-5.1 x10E12/L<br>M: 4.3-5.7 x10E12/L     | 3059                  | 253                  | 2003                 | 0                      |
| K+        | 3.5-5.51 mM                                    | 4608                  | 260                  | 333                  | 114                    |
| NA+       | 136-146 mM                                     | 3352                  | 696                  | 1262                 | 5                      |
| NEUTR%    | 57-67 %                                        | 745                   | 4017                 | 552                  | 1                      |
| LYMPH%    | 23-33 %                                        | 717                   | 383                  | 4214                 | 1                      |
| MONO%     | 3-7 %                                          | 2331                  | 2264                 | 719                  | 1                      |
| EOS%      | 1-3 %                                          | 1006                  | 340                  | 3969                 | 0                      |
| BASO%     | 0-0.75 %                                       | 5104                  | 210                  | 0                    | 1                      |

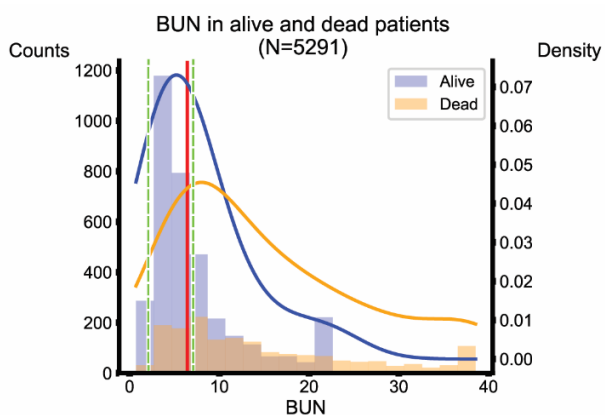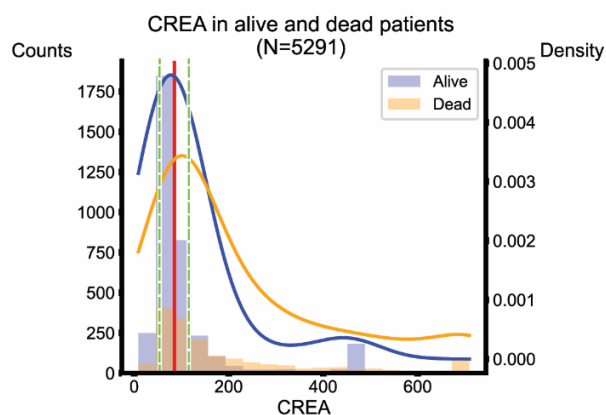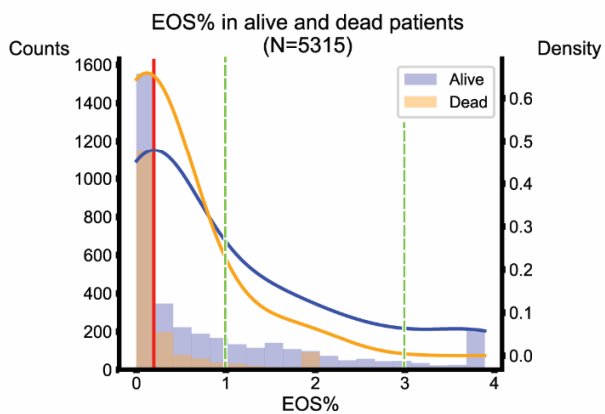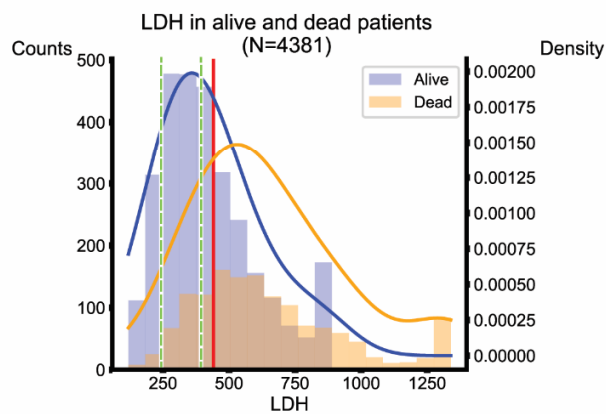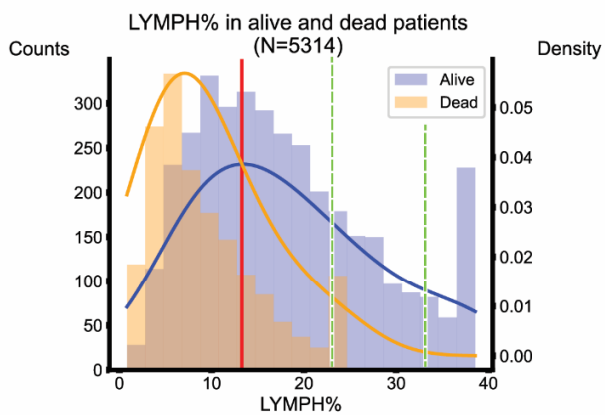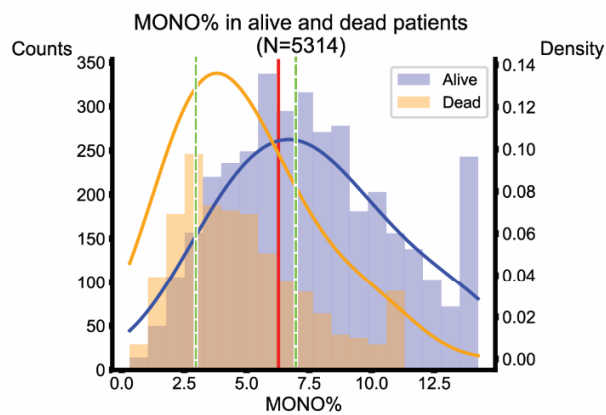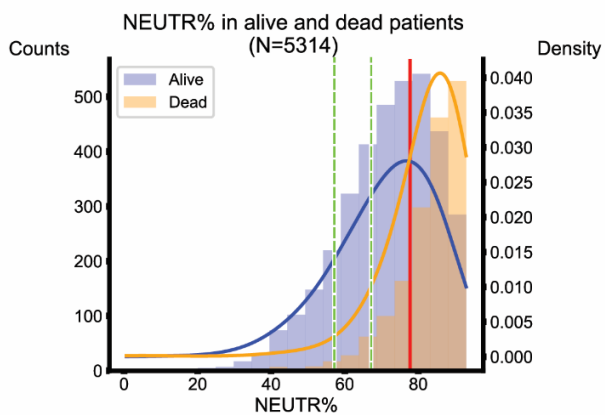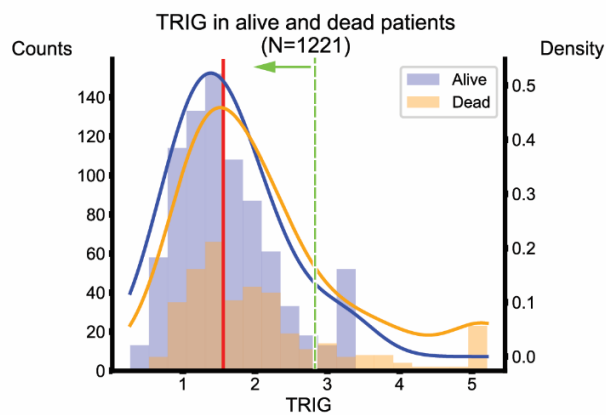

**Figure S2.** Distribution of blood parameter values in the total sample. BUN, CREA, EOS%, LDH, LYMPH%, MONO%, NEUTR% are used in the final model, while TRIG was identified as an insignificant blood biomarker (**Table S1**). N = Number of people within the total sample that had the corresponding blood biomarker measured. Blue and orange curves represent KDE estimates of the biomarker distributions (bandwidth =  $0.3 \times$  standard deviation). For display purposes, 5% of samples with the highest values were collapsed for into the histograms' last bin. Red lines mark the median cutoff values used to create binary variables. Green lines mark the reference ranges <sup>3</sup>.



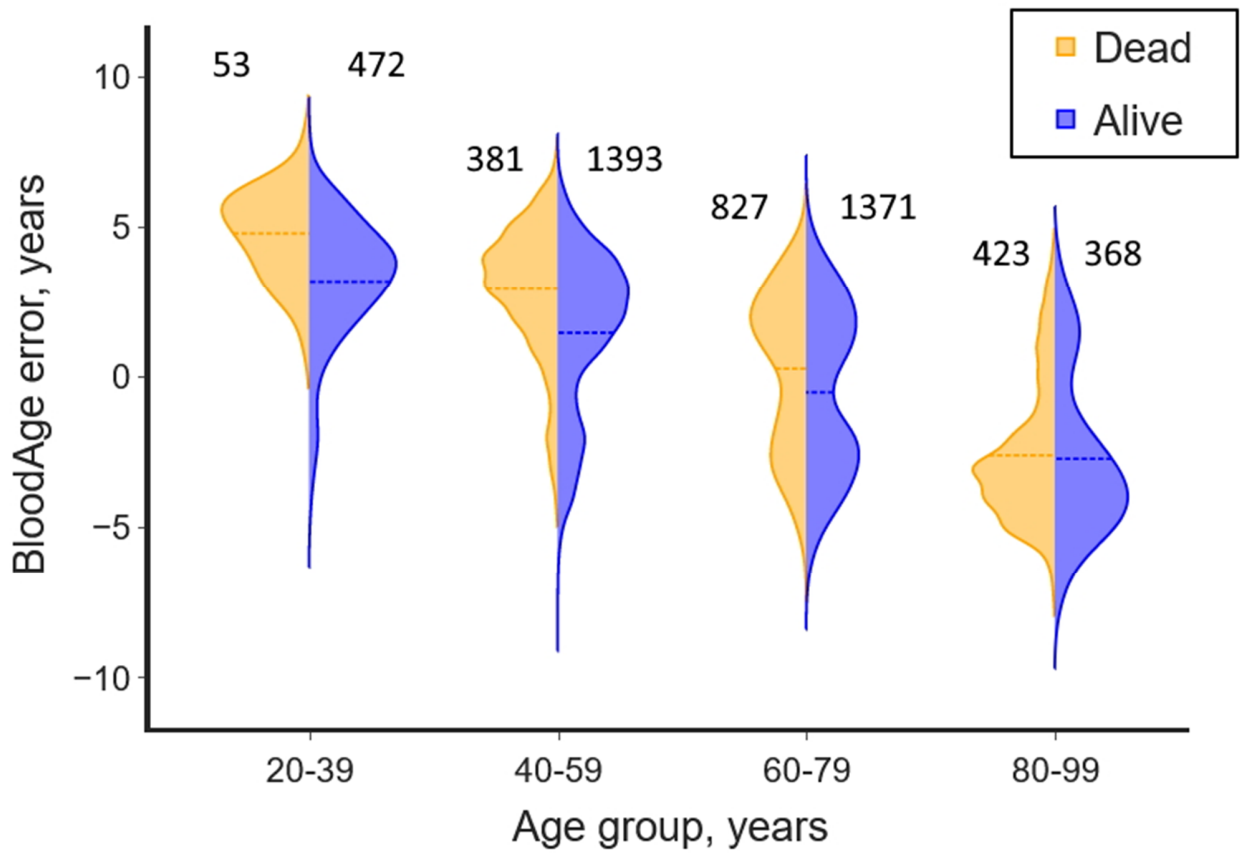

**Figure S3** — Normalized violin plots for BloodAge error distributions. Prediction error depends on chronological age in the COVID sample. In all age groups, except for 80-99 years, the lethal cases had higher BloodAge errors. The number of patients in each subsample is marked above the violin. Dashed lines mark the mean values.

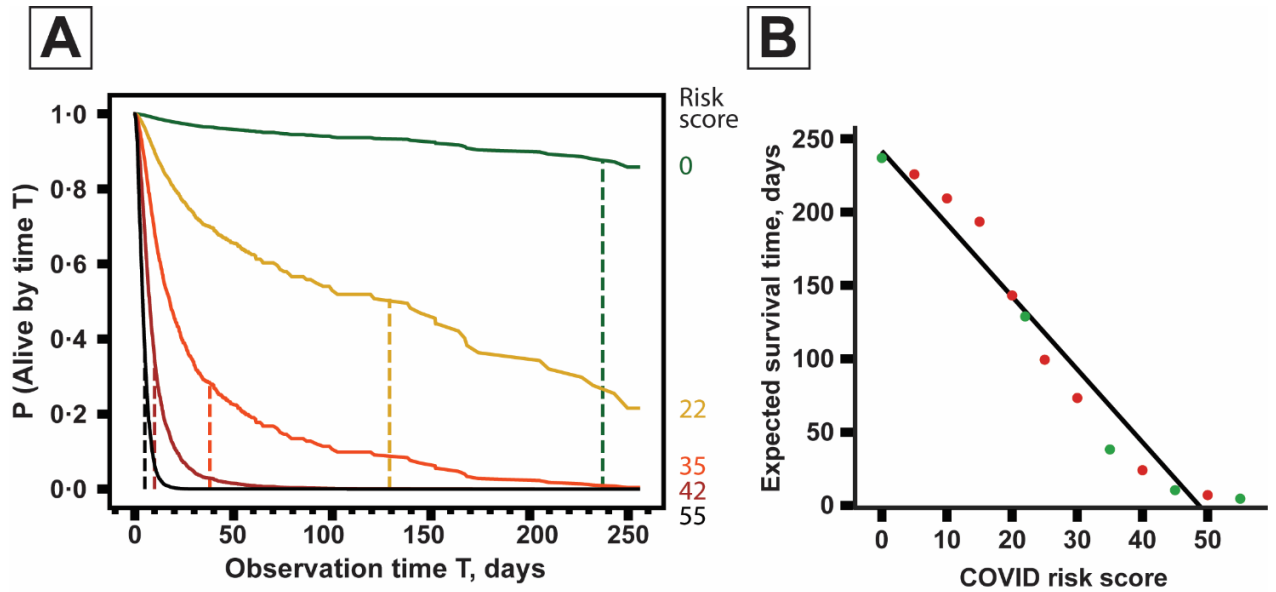

**Figure S4 —**

(A) Survival functions of four mock patients with COVID risk score assigned. The score belongs in the  $[0; 55]$  region, lower values indicate lower mortality risk and longer expected survival time (dashed lines).

(B) The proposed COVID risk score can be translated into the expected survival time using the formula obtained from linear regression:  $\text{Time(days)} = 242 - 5 \times \text{Score}$ . Green marks the points used as cutoff values for the COVID risk score.

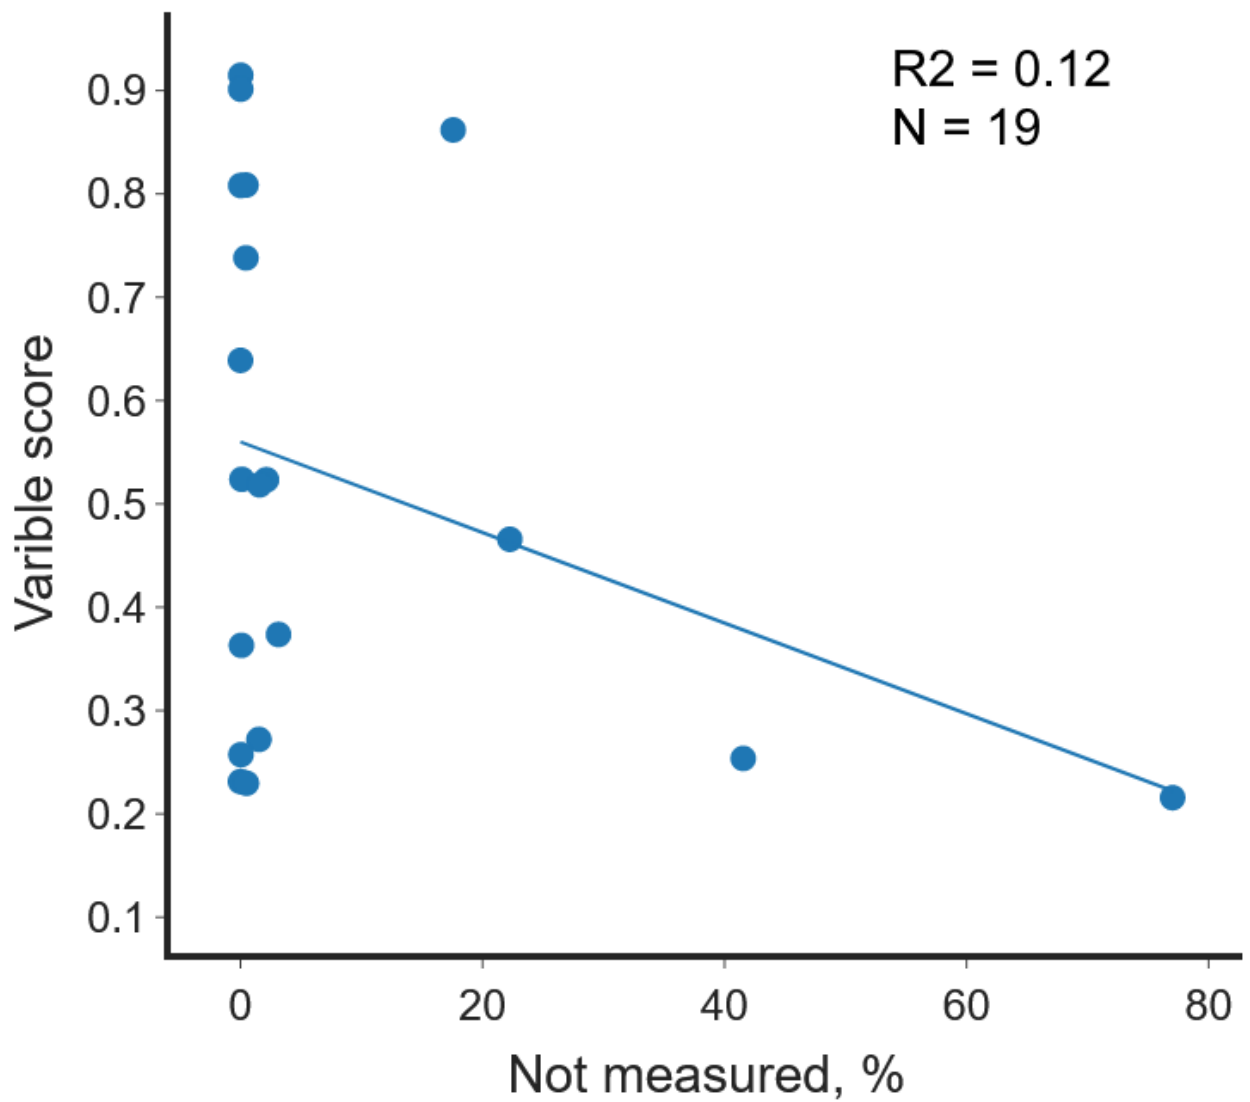

**Figure S5** — The feature selection procedure eliminated most variables with a high number of missing measurements. The leftover features with a low number of missing values have a wide spectrum of importance scores.

R2 = Coefficient of determination; N = Total number of features plotted.

- 1 Mamoshina P, Kochetov K, Putin E, *et al.* Population Specific Biomarkers of Human Aging: A Big Data Study Using South Korean, Canadian, and Eastern European Patient Populations. *The Journals of Gerontology: Series A* 2018; **73**: 1482–90.
- 2 Szumilas M. Explaining Odds Ratios. *J Can Acad Child Adolesc Psychiatry* 2010; **19**: 227–9.
- 3 Goldman L, Plum F, Bennett CJ. Cecil Textbook of Medicine, 21st edn. 2000.
